# Supplementary material
Source: Springer Nature journal article supplement (https://www.springermedizin.de/resource/supplementary/12879_2014_3826_MOESM3_ESM.pdf/9446728)

**«Fighting an uphill battle»**

**«encountering  
surprises»**

**«reaching the  
limits of  
systems»**

**«dealing with  
disruption»**

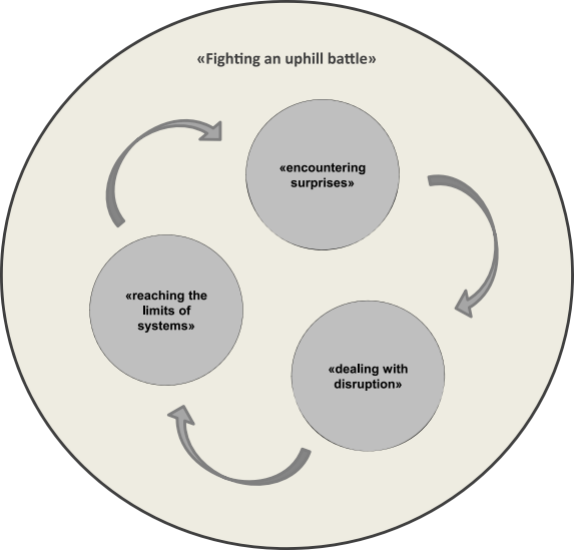

Supplement: MOESM3 [file 9446728]
